# Supplementary material
Source: PubMed Central journal article supplement (PMC11423063)

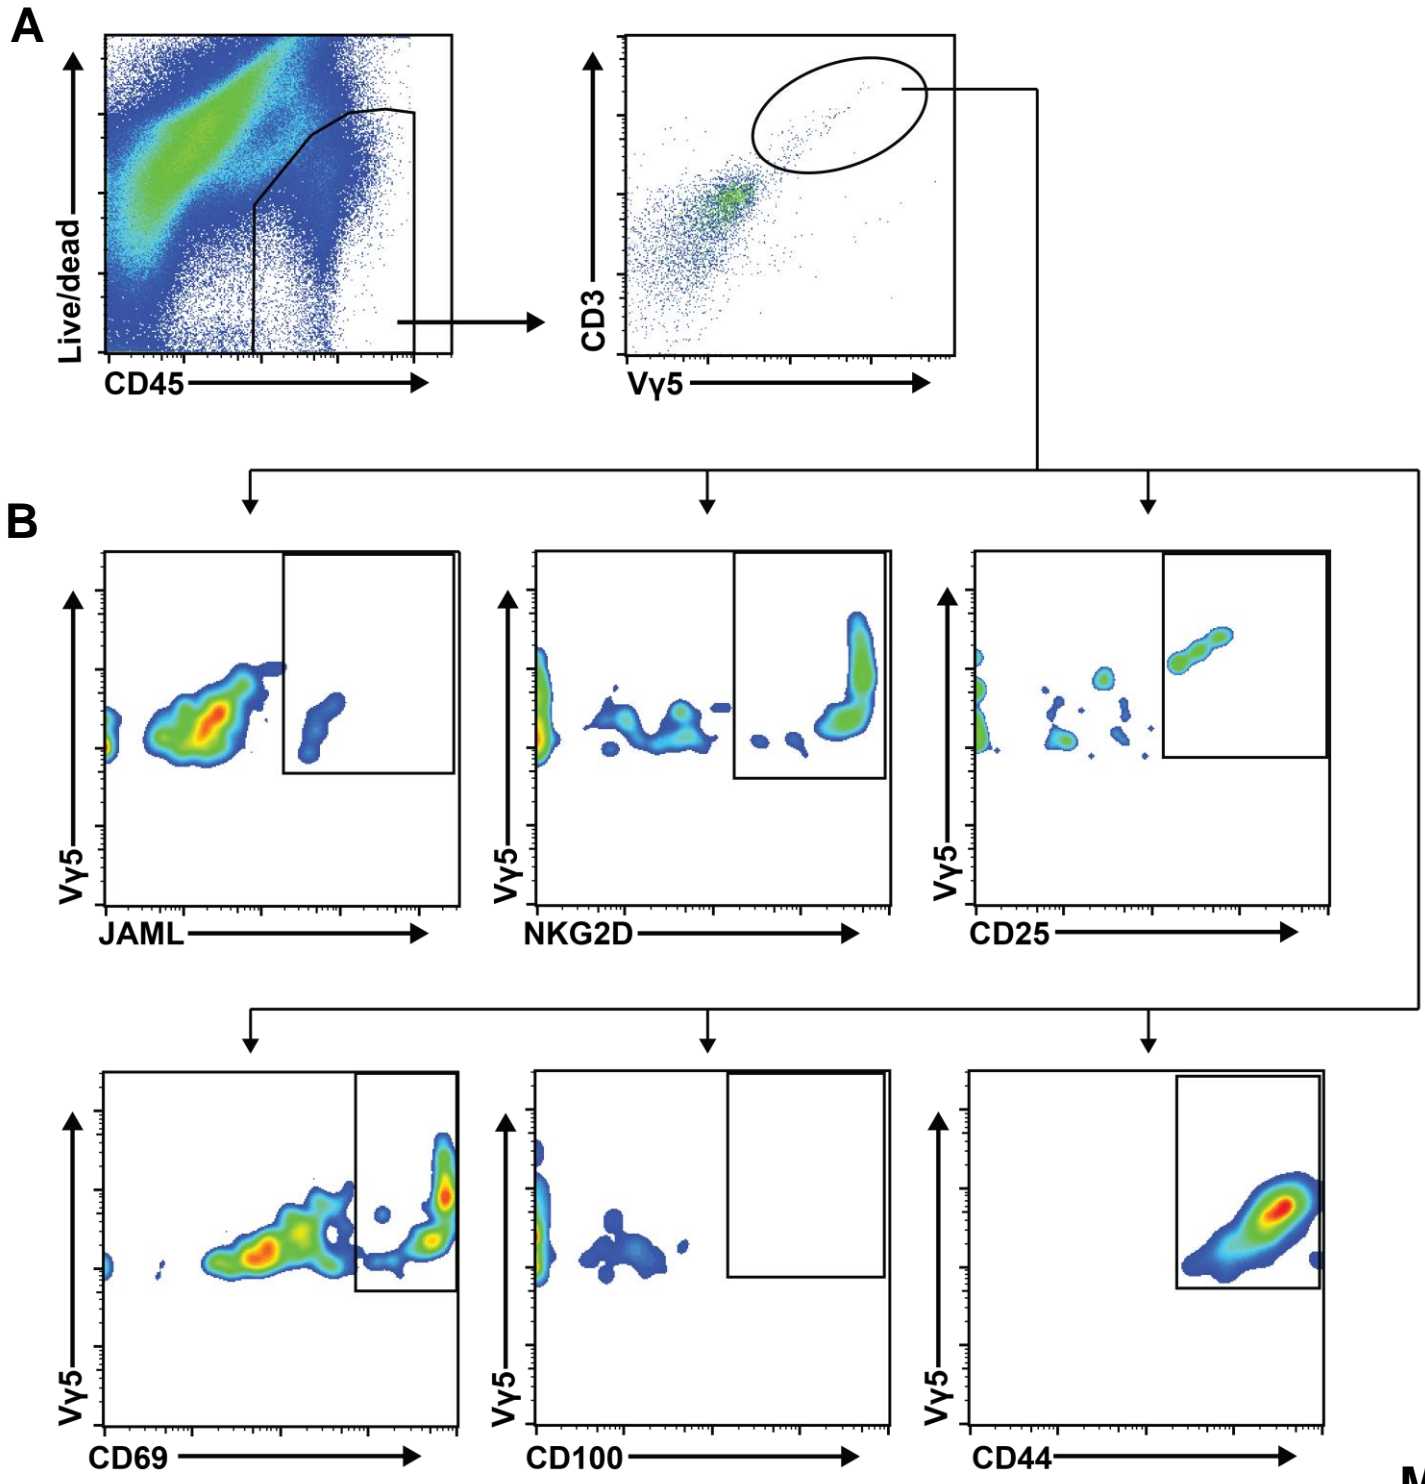

Marnin *et al.* – Supp. Figure 1

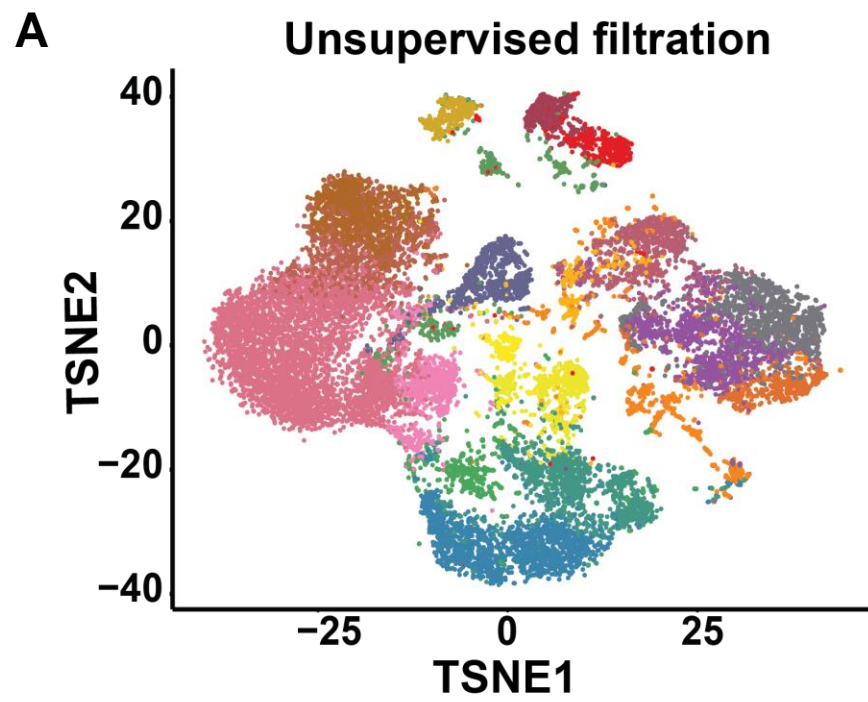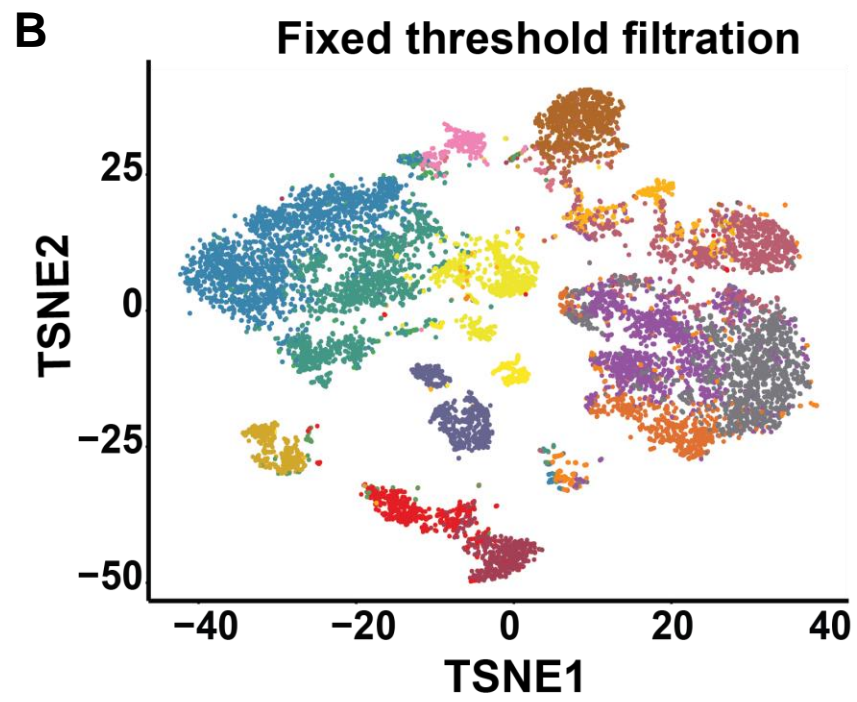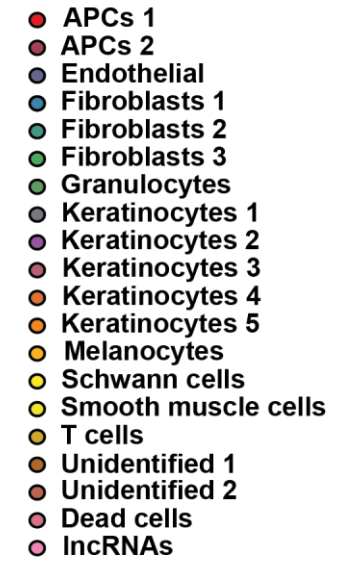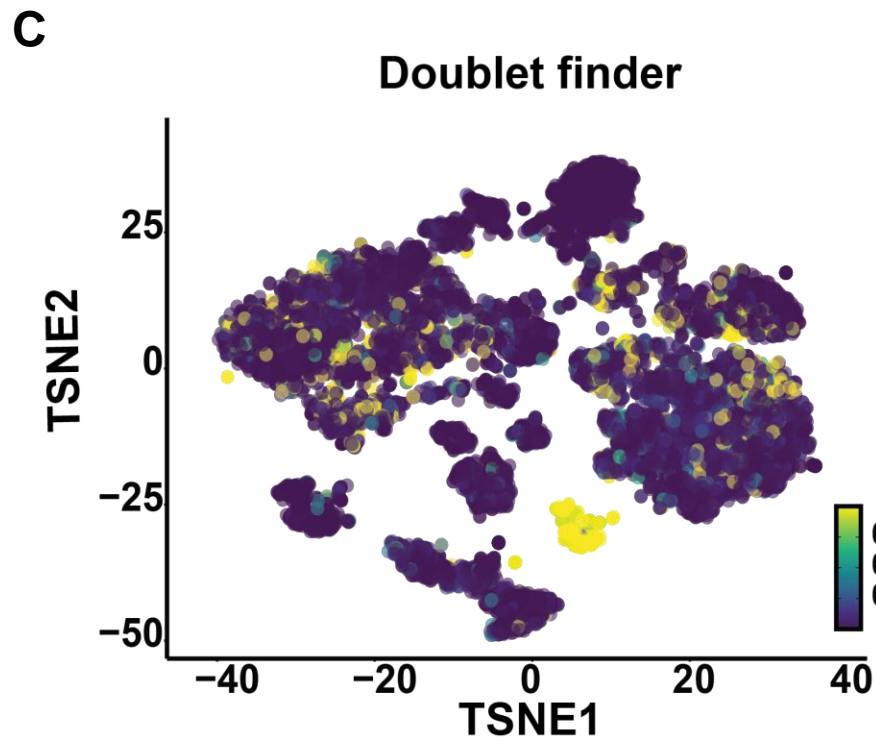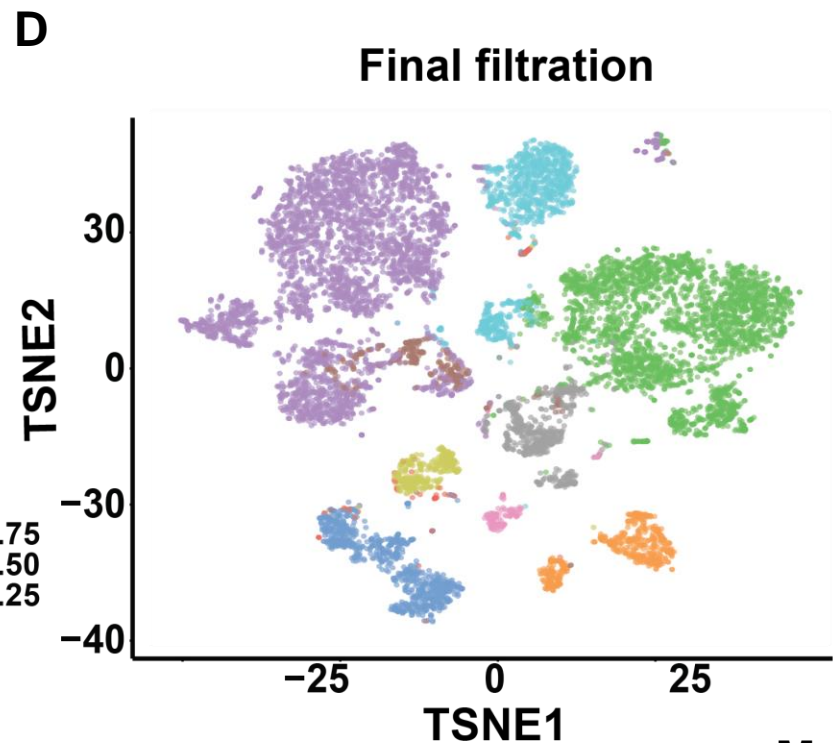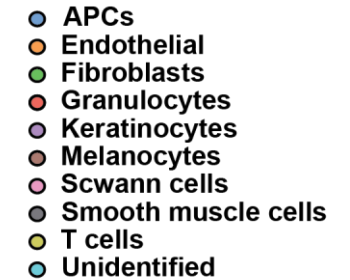

**A**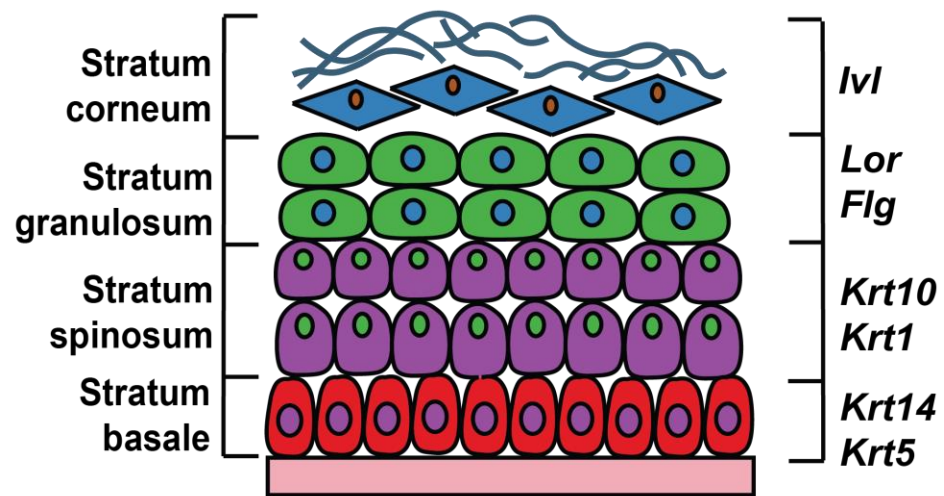**B**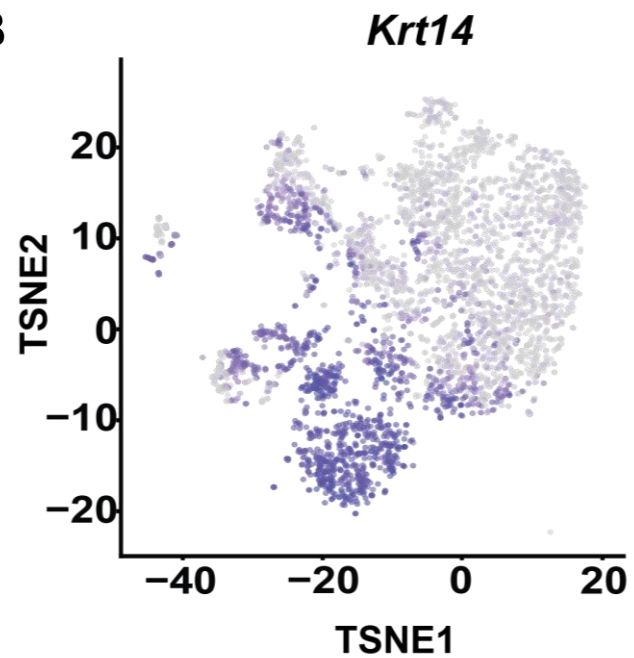**C**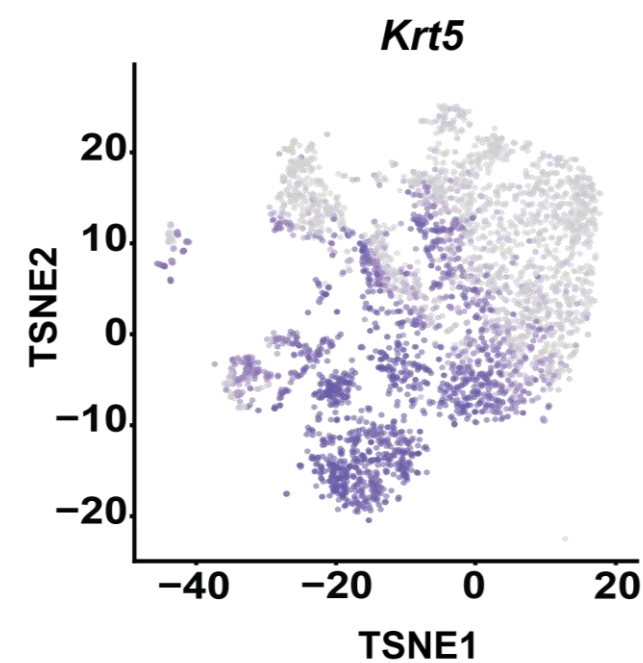**D**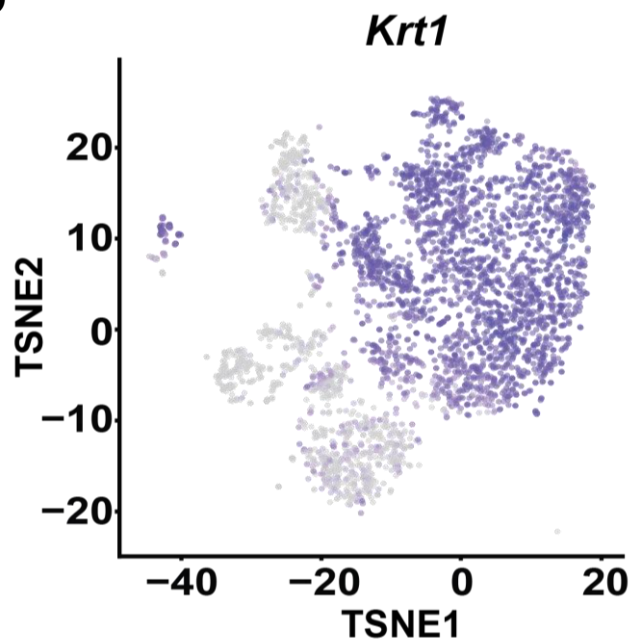**E**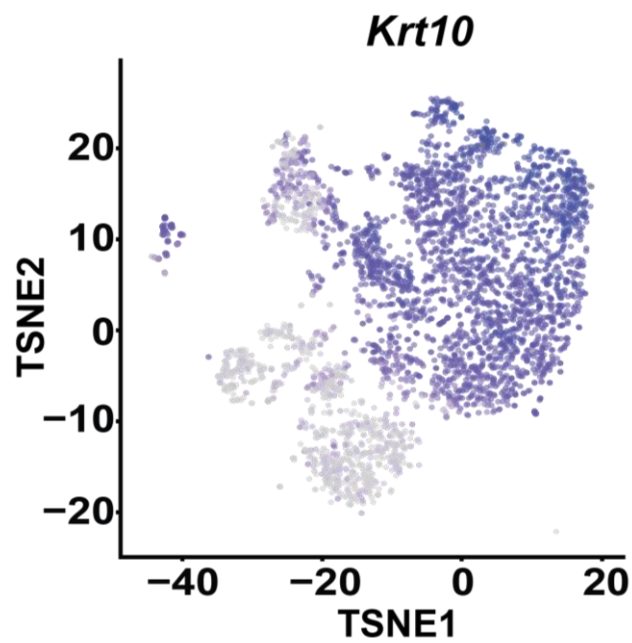**F**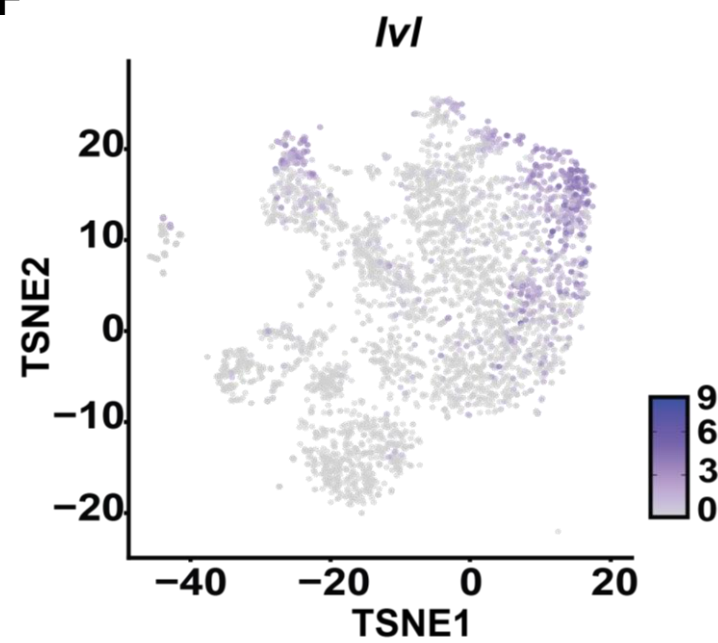



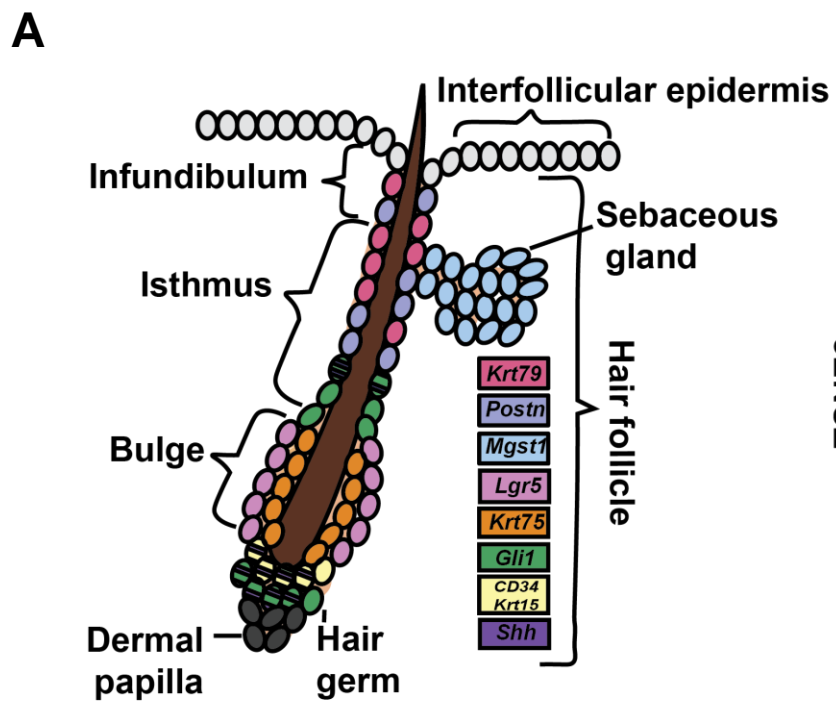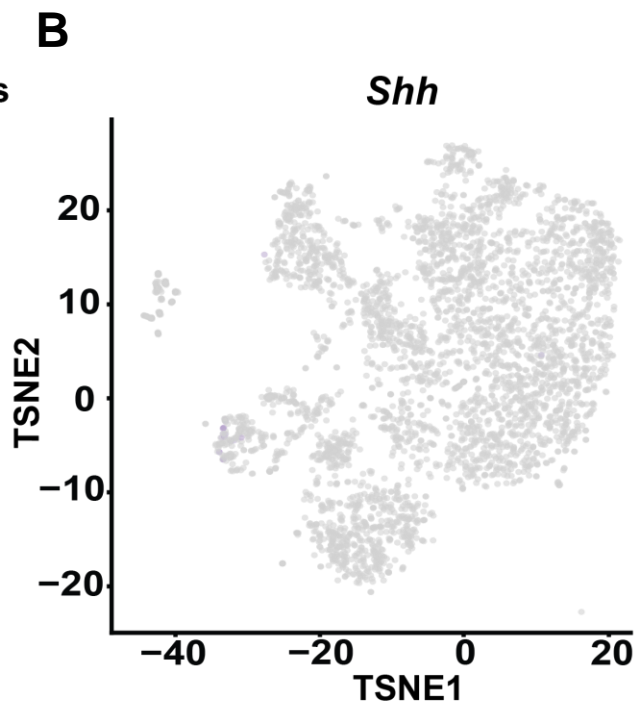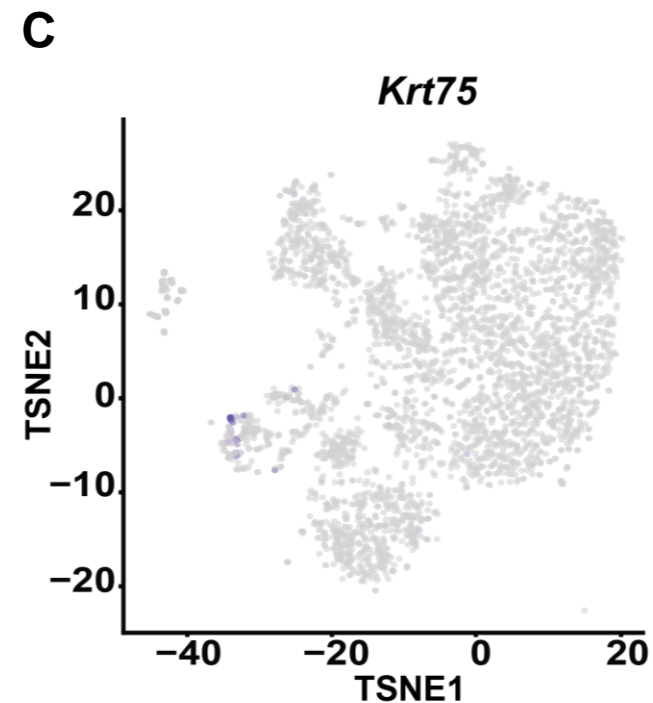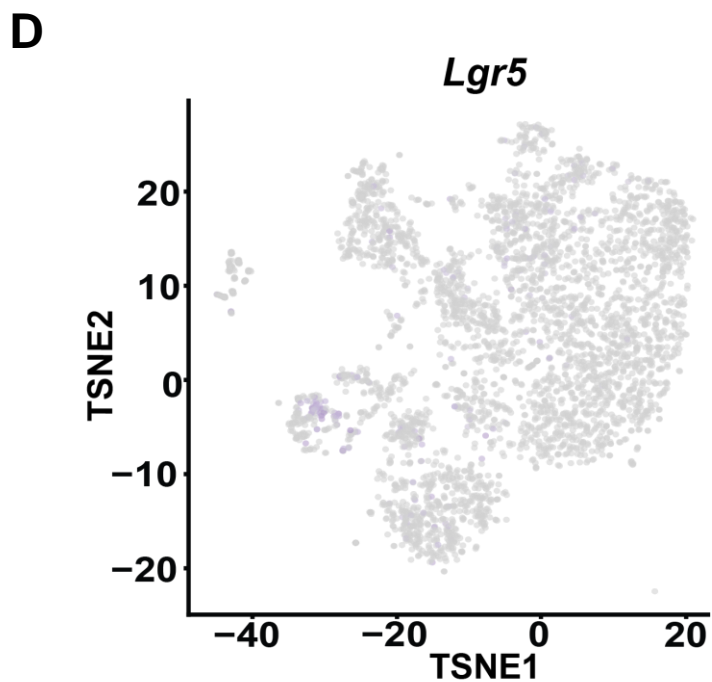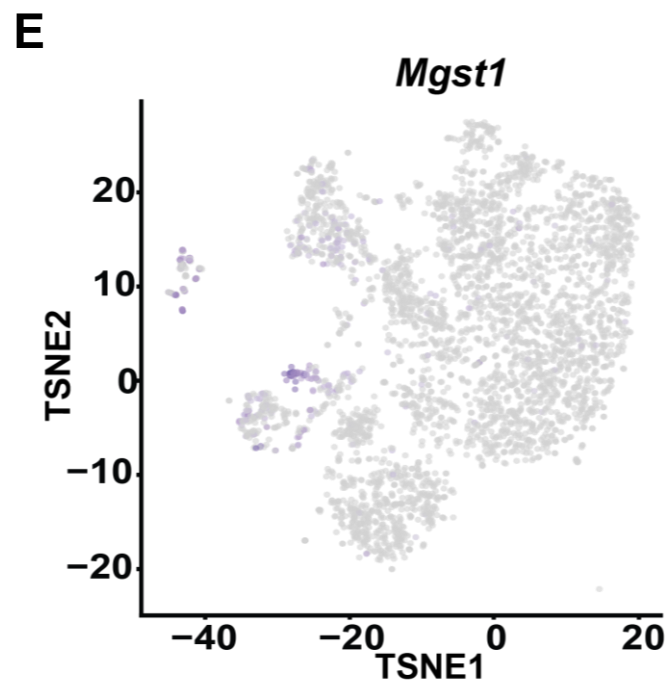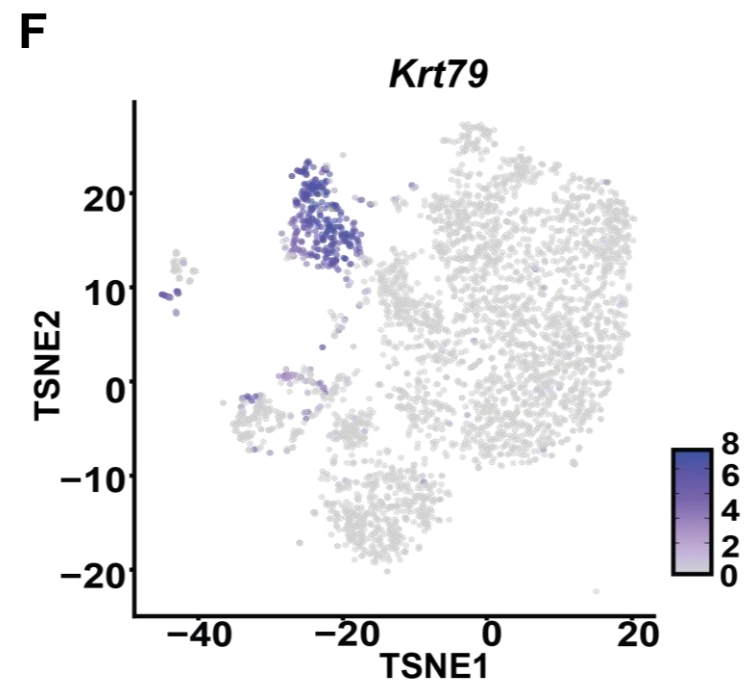

**A**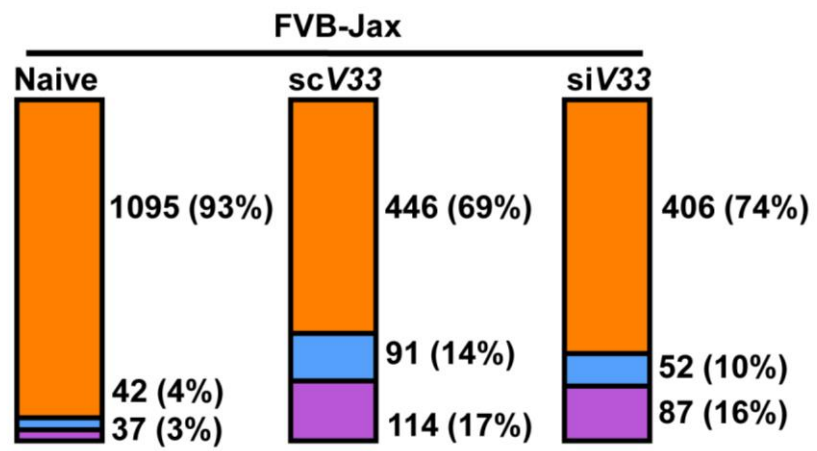**B**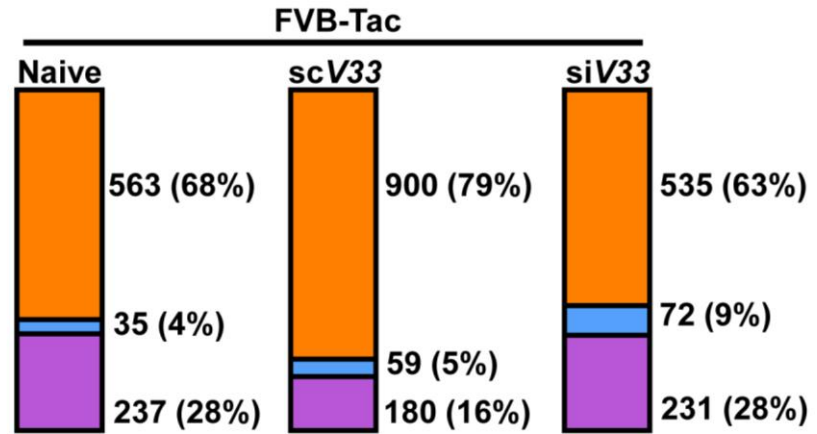

■ Keratinocytes   
 ■ T cells   
 ■ APCs

**C**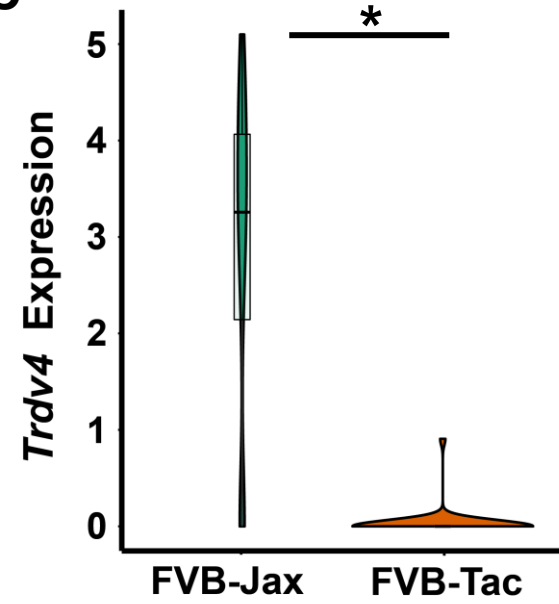

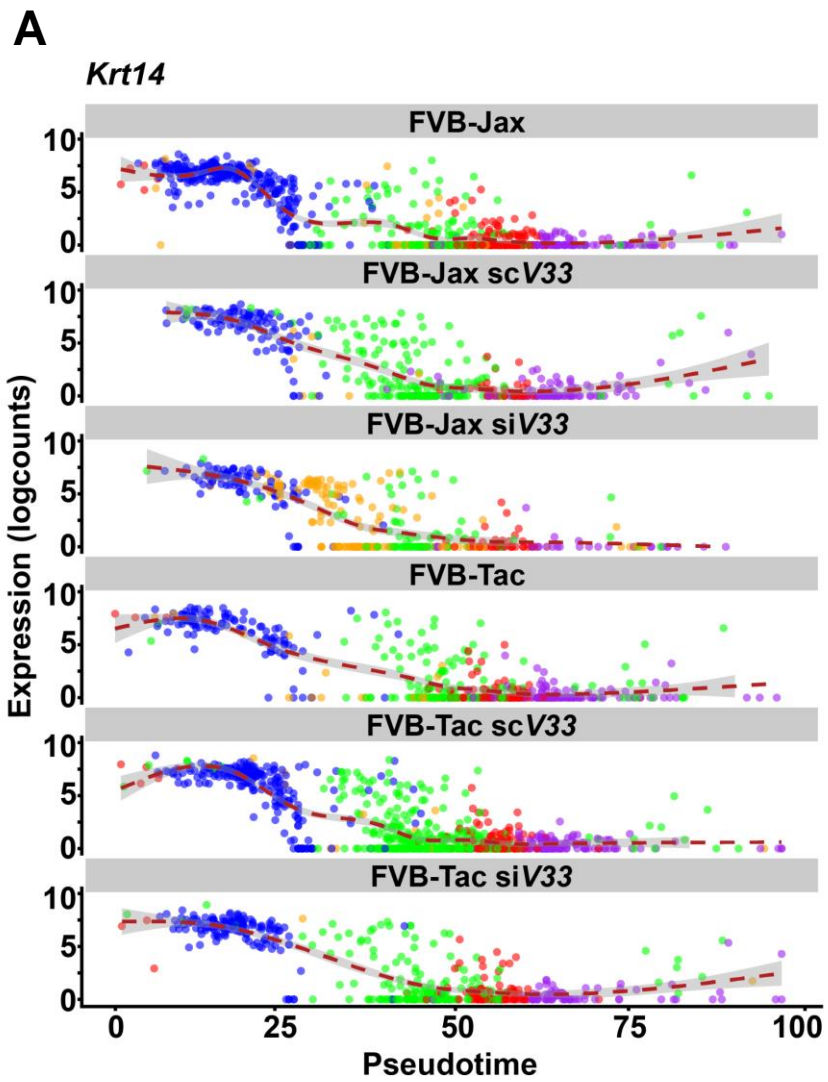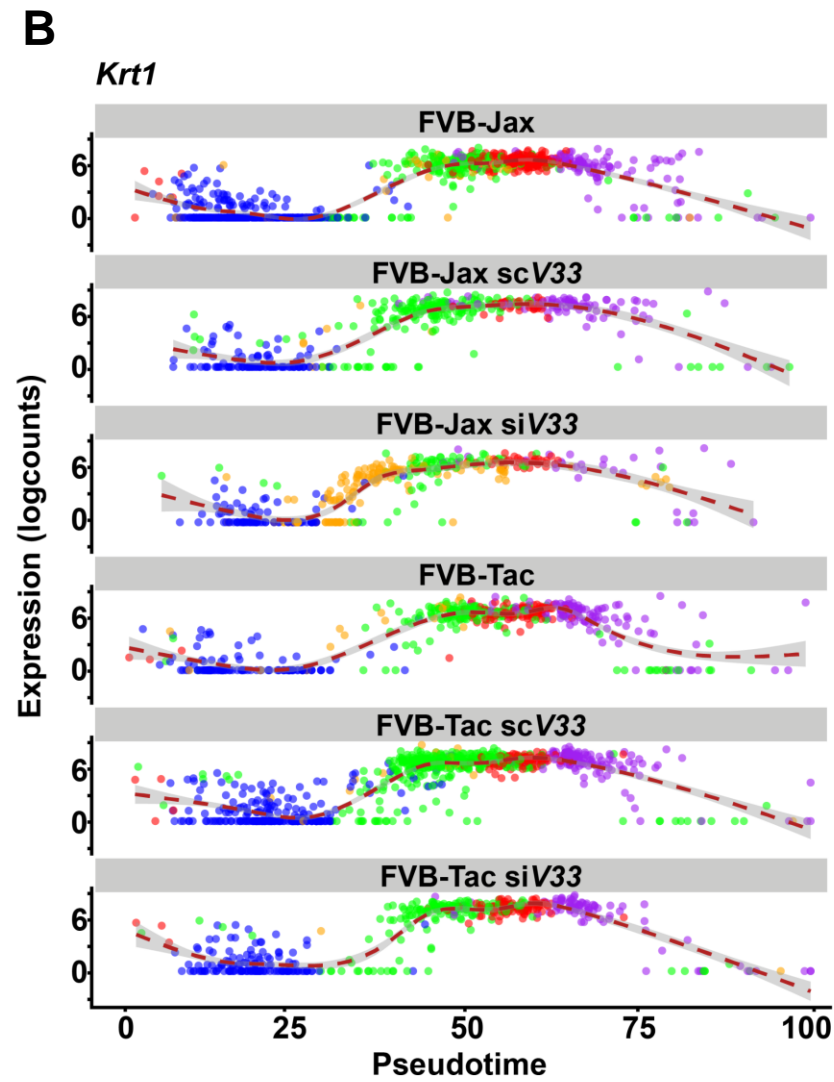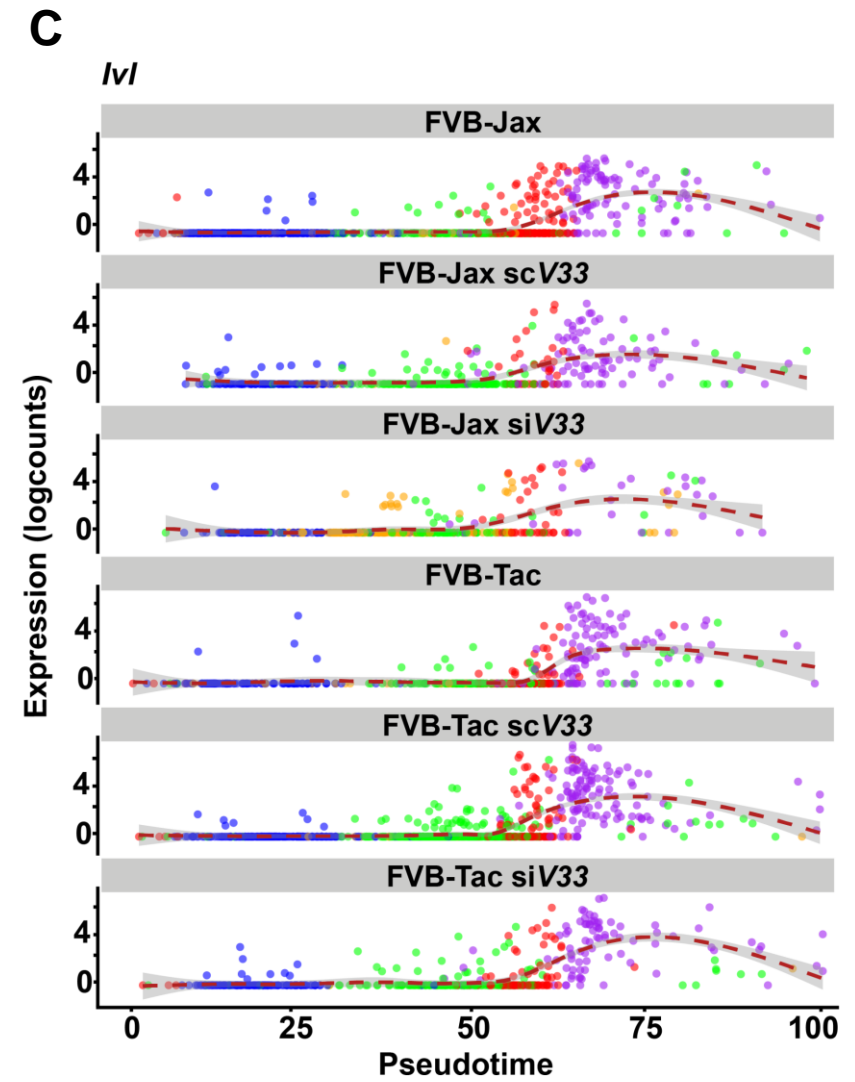

**Cluster**

- Undifferentiated keratinocytes
- Early differentiating keratinocytes 1
- Early differentiating keratinocytes 2
- Late differentiating keratinocytes
- Unidentified

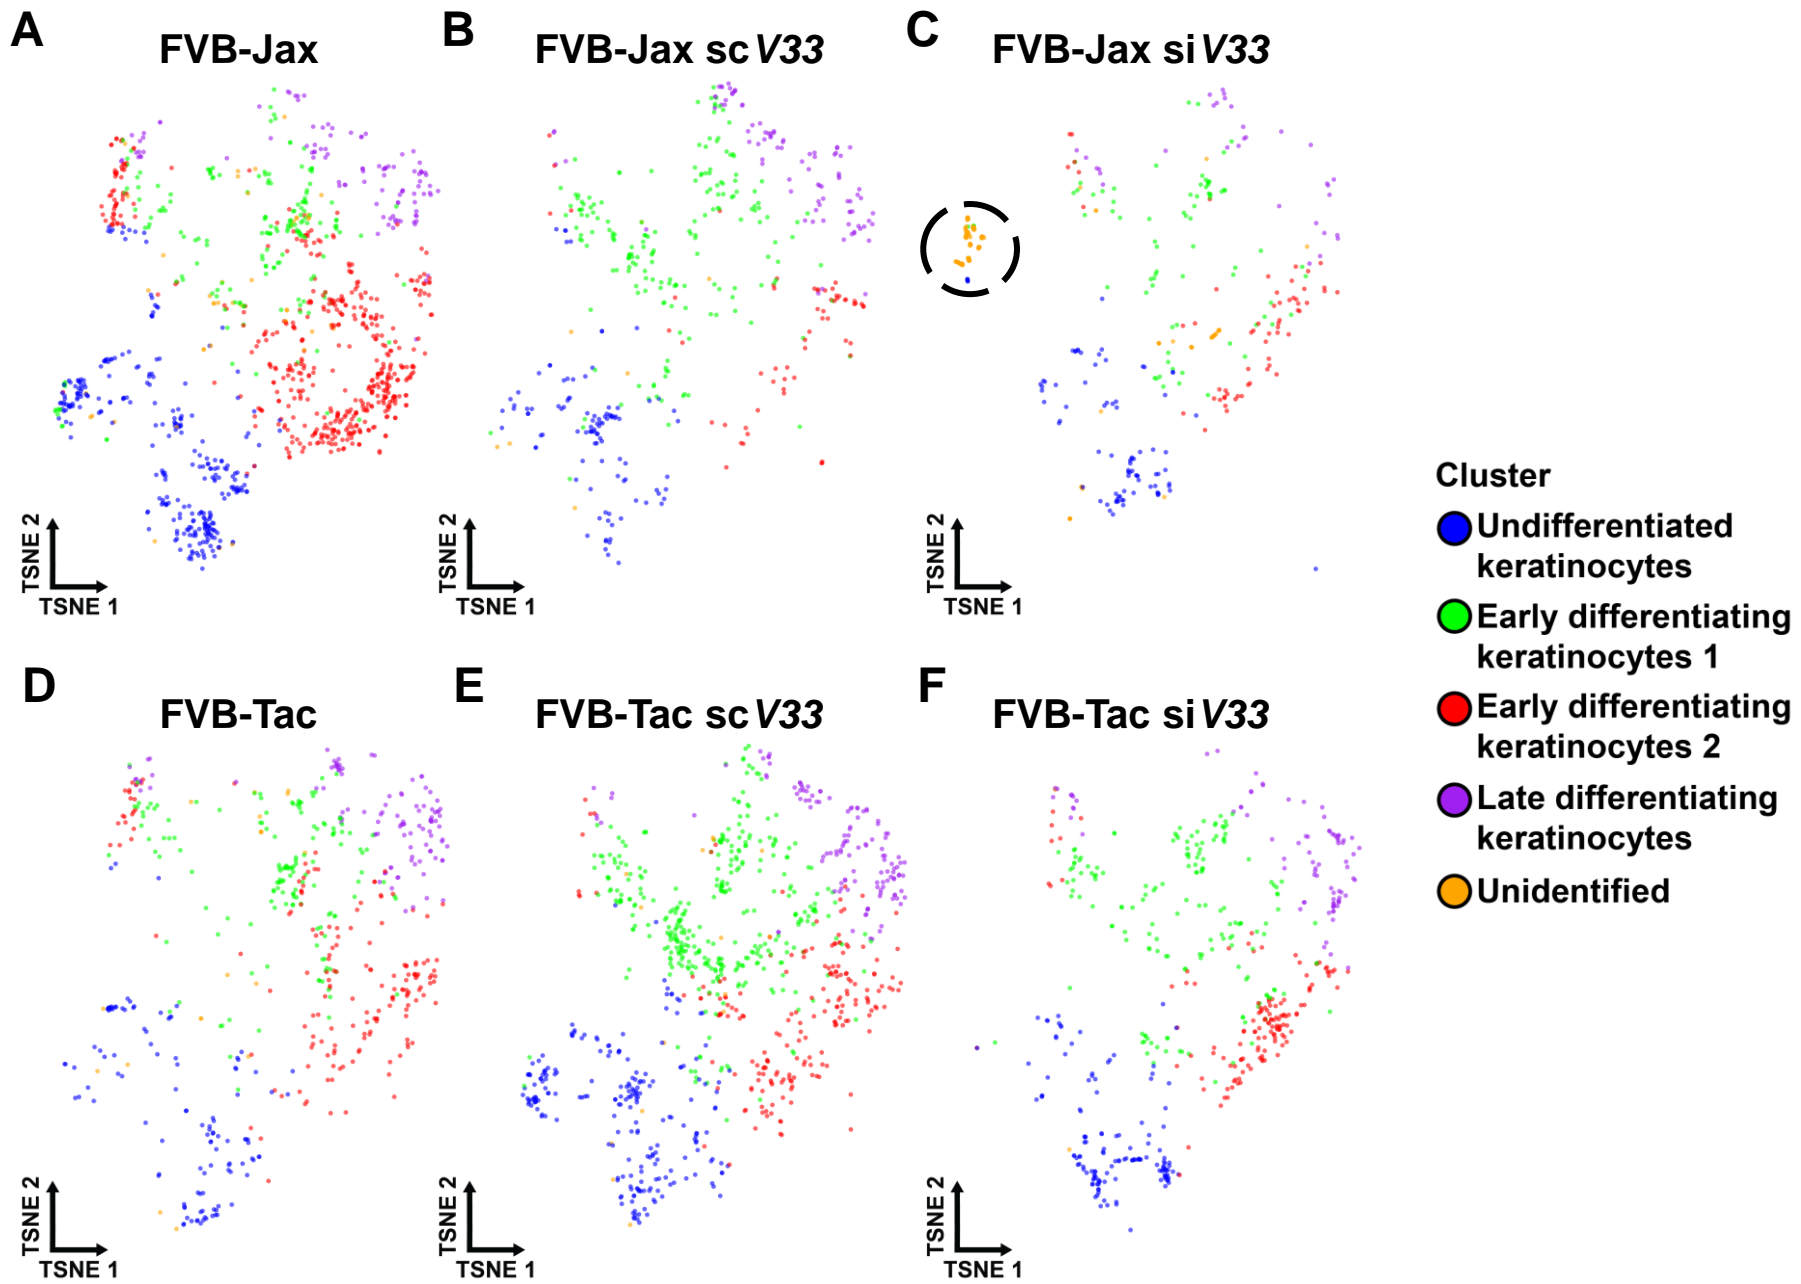

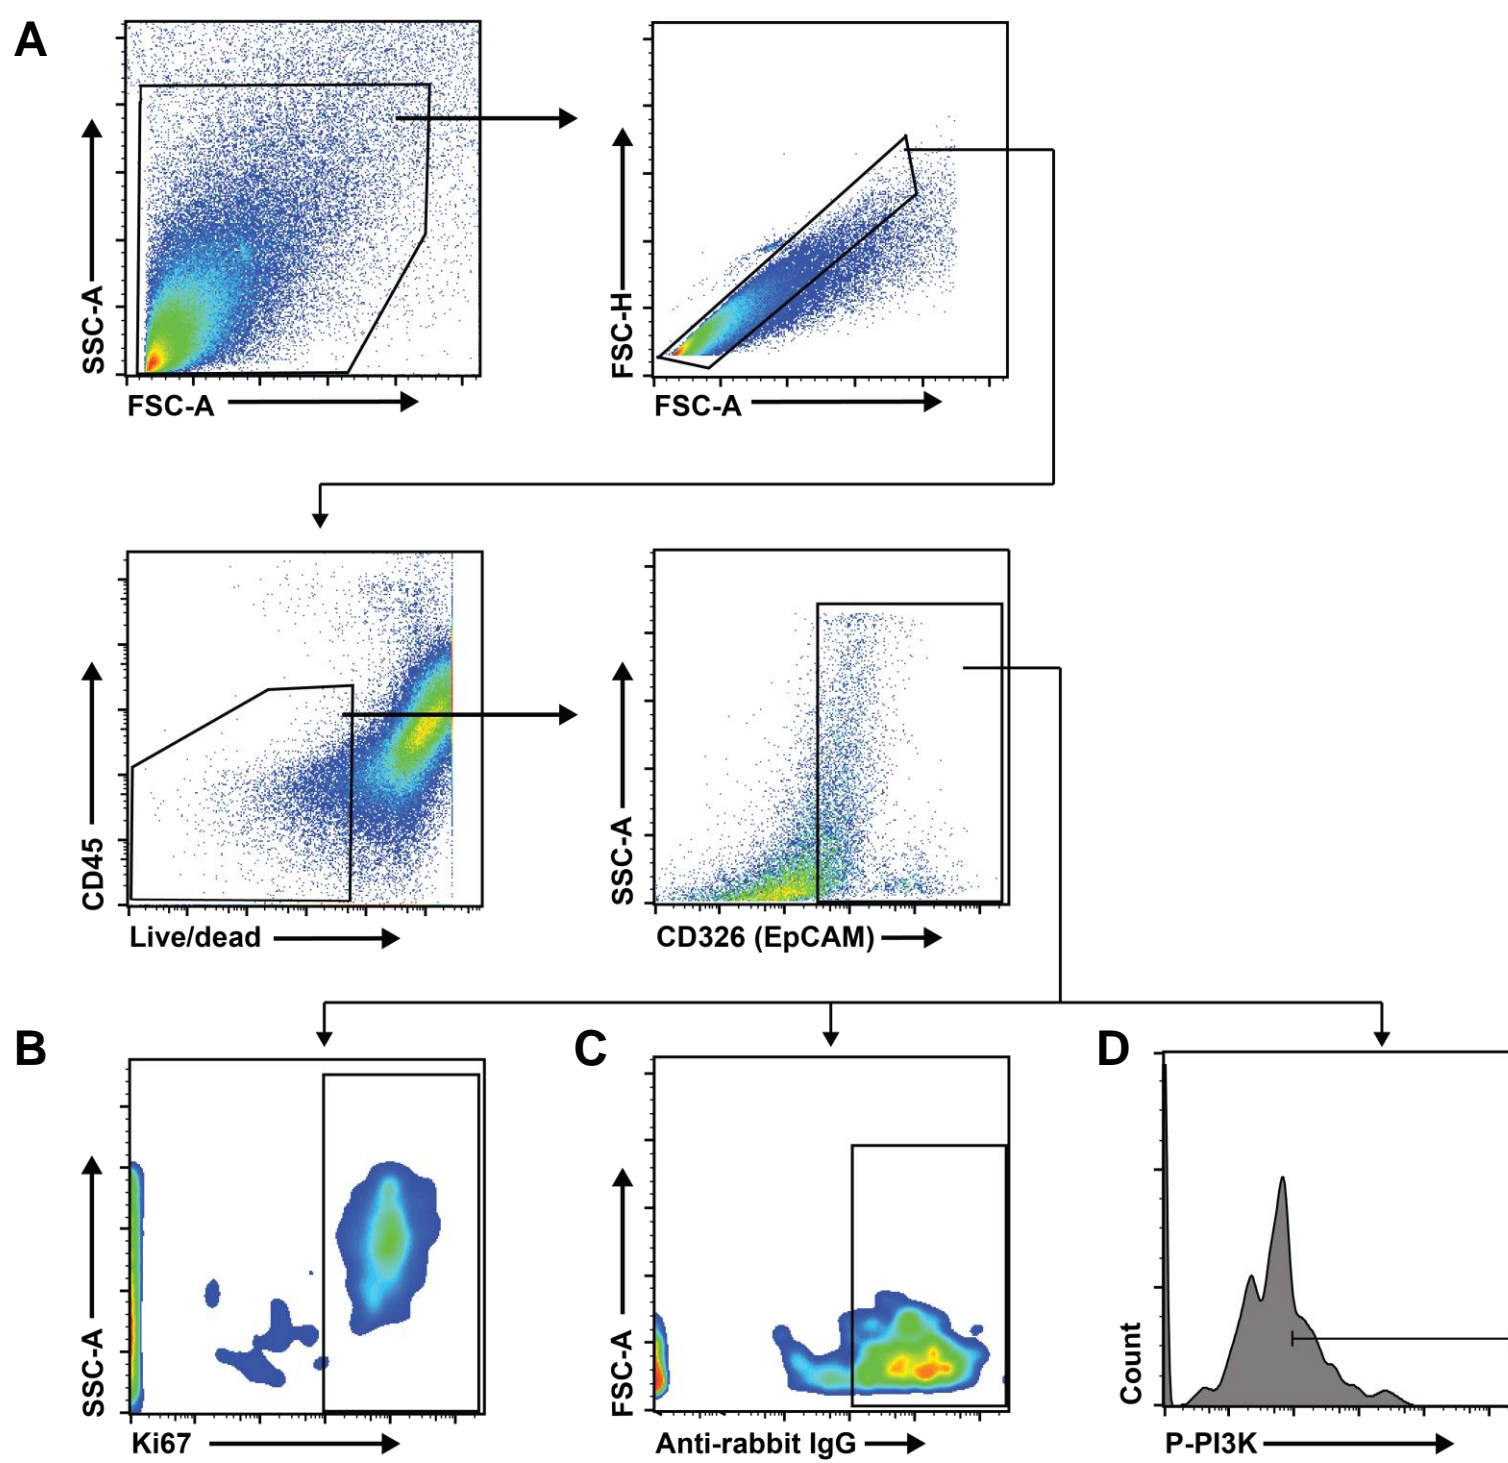

Supplement: media-1.pdf [file media-1.pdf]
