# Supplementary material
Source: PubMed Central journal article supplement (PMC11423063)
Supplement: NIHPP2023.11.10.566612V2-supplement-1.pdf [file NIHPP2023.11.10.566612V2-supplement-1.pdf]

**Supplementary Table 1: Primers and siRNA sequences**

| Target                                 | Type      | Location Within mRNA | SiRNA/Primer Name | Strand               | Primer Sequence                |
|----------------------------------------|-----------|----------------------|-------------------|----------------------|--------------------------------|
| <i>I. scapularis</i><br><i>Vamp33</i>  | siRNA     | Start at 300         | Vamp33SiF         | Forward              | AAGGACACAGTGTGGAGAGATCCTGTCTC  |
|                                        |           |                      | Vamp33SiR         | Reverse              | AAATCTCTCCACACTGTGTCCCCTGTCTC  |
|                                        | Scrambled |                      | Vamp33ScF         | Forward              | AAGTGAGGGACGCATAGTAGACCTGTCTC  |
|                                        |           |                      | Vamp33ScR         | Reverse              | AATCTACTATGCGTCCCTCACCCCTGTCTC |
|                                        | qRT-PCR   | Start at 76          | Vamp33qR-F        | Forward              | TCATACCTGAAGTTGTCCAA           |
|                                        |           | Start at 180         | Vamp33qR-R        | Reverse              | CTCAAGAATGCCACTGTTG            |
| <i>D. variabilis</i><br><i>Vamp33</i>  | siRNA     | Start at 280         | Vamp33Derm-SiF    | Forward              | AACCGGATGGTGATGTTAATCCCTGTCTC  |
|                                        |           |                      | Vamp33Derm-SiR    | Reverse              | AAGATTAACATCACCATCCGGCCTGTCTC  |
|                                        | Scrambled |                      | Vamp33Derm-ScF    | Forward              | AAGCCTCAGGTGGAATTAGTTCCTGTCTC  |
|                                        |           |                      | Vamp33Derm-ScR    | Reverse              | AAAATAATTCCACCTGAGGCCCTGTCTC   |
|                                        | qRT-PCR   | Start at 78          | Vamp33DqR-2F      | Forward              | TCACCTAAAGTTGTCCAACCC          |
|                                        |           | Start at 160         | Vamp33DqR-2R      | Reverse              | TCAAGGATTCCACTGTTGGG           |
|                                        | qRT-PCR   | Start at 64          | Vamp33DqR-F       | Forward              | GACGTGGTTACTTCTCACCTAAA        |
| Start at 148                           |           | Vamp33DqR-R          | Reverse           | CTGTTGGGCCGTACACAATA |                                |
| <i>A. americanum</i><br><i>Vamp33</i>  | siRNA     | Start at 280         | Vamp33AA-SiF      | Forward              | AACCAGATGGTGATGTGAACCCCTGTCTC  |
|                                        |           |                      | Vamp33AA-SiR      | Reverse              | AAGGTTACATCACCATCTGGCCTGTCTC   |
|                                        | Scrambled |                      | Vamp33AA-ScF      | Forward              | AAGGGTGCTAACACGGACTTACCTGTCTC  |
|                                        |           |                      | Vamp33AA-ScR      | Reverse              | AATAAGTCCGTGTTAGCACCCCTGTCTC   |
|                                        | qRT-PCR   | Start at 76          | Vamp33AA qR-F     | Forward              | TCTCATCTAAAGCTTTCCAACCC        |
|                                        |           | Start at 160         | Vamp33AA qR-R     | Reverse              | AAGGATGCCACTGTTGGG             |
| <i>I. scapularis</i><br>$\beta$ -actin | qRT-PCR   | Start at 618         | ActinIS 2F        | Forward              | GGTCATCACAATCGGCAAC            |
|                                        |           | Start at 742         | ActinIS 2R        | Reverse              | ATGGAGTTGTACGTGGTCTC           |
| <i>A. americanum</i><br>$\beta$ -actin | qRT-PCR   | Start at 285         | ActinAA F         | Forward              | GTCATGGTCGGCATGGG              |
|                                        |           | Start at 365         | ActinAA R         | Reverse              | ATGCCGTGCTCAATGGG              |
| <i>D. variabilis</i><br>$\beta$ -actin | qRT-PCR   | Start at 798         | ActinIS 2F        | Forward              | GGTCATCACAATCGGCAAC            |
|                                        |           | Start at 905         | ActinIS 2R        | Reverse              | ATGGAGTTGTACGTGGTCTC           |

**Supplementary Table 2: Cell markers**

| Cell type                                         | Cell population      | Gene                                 | Ensembl            |
|---------------------------------------------------|----------------------|--------------------------------------|--------------------|
| Antigen presenting cells                          | All                  | <i>H2-Aa</i>                         | ENSMUSG00000036594 |
|                                                   |                      | <i>H2-Ab1</i>                        | ENSMUSG00000073421 |
|                                                   | Langerhans           | <i>Cd207</i>                         | ENSMUSG00000034783 |
|                                                   | Dendritic cells      | <i>Ilgax</i>                         | ENSMUSG00000030789 |
|                                                   |                      | <i>Cd80</i>                          | ENSMUSG00000075122 |
|                                                   |                      | <i>Cd86</i>                          | ENSMUSG00000022901 |
|                                                   |                      | <i>Ly75</i>                          | ENSMUSG00000026980 |
|                                                   | Macrophage           | <i>Cd209a</i>                        | ENSMUSG00000031494 |
|                                                   |                      | <i>Adgre1</i>                        | ENSMUSG00000004730 |
|                                                   | Keratinocytes        | Undifferentiated<br>(Stratum basale) | <i>Ilgam</i>       |
| <i>Krt5</i>                                       |                      |                                      | ENSMUSG00000061527 |
| <i>Krt14</i>                                      |                      |                                      | ENSMUSG00000045545 |
| Differentiating<br>(Stratum spinosum)             |                      | <i>Krt15</i>                         | ENSMUSG00000054146 |
|                                                   |                      | <i>Krt 1</i>                         | ENSMUSG00000046834 |
|                                                   |                      | <i>Krt2</i>                          | ENSMUSG00000064201 |
| Terminally differentiated<br>(Stratum granulosum) |                      | <i>Krt10</i>                         | ENSMUSG00000019761 |
|                                                   |                      | <i>Ivl</i>                           | ENSMUSG00000049128 |
| Corneocytes<br>(Stratum corneum)                  |                      | <i>Flg</i>                           | ENSMUSG00000102439 |
| T cells                                           |                      | All                                  | <i>Klk5</i>        |
|                                                   | <i>Cd3d</i>          |                                      | ENSMUSG00000032094 |
|                                                   | <i>Cd3e</i>          |                                      | ENSMUSG00000032093 |
|                                                   | $\alpha\beta$ T cell | <i>Cd3g</i>                          | ENSMUSG00000002033 |
|                                                   |                      | <i>Trac</i>                          | ENSMUSG00000076928 |
|                                                   |                      | <i>Trbc1</i>                         | ENSMUSG00000076490 |

|                  |                     |                    |                    |
|------------------|---------------------|--------------------|--------------------|
|                  |                     | <i>Trbc2</i>       | ENSMUSG00000076498 |
|                  |                     | <i>CD4</i>         | ENSMUSG00000023274 |
|                  |                     | <i>CD8a</i>        | ENSMUSG00000053977 |
|                  | γδ T cell           | <i>Trdc</i>        | ENSMUSG00000104876 |
|                  |                     | <i>Tcrg-C1</i>     | ENSMUSG00000076749 |
|                  |                     | <i>Tcrg-C2</i>     | ENSMUSG00000076752 |
|                  |                     | <i>Tcrg-C4</i>     | ENSMUSG00000076757 |
|                  | DETCs               | <i>Trdv4</i>       | ENSMUSG00000076867 |
|                  |                     | <i>Sema4d</i>      | ENSMUSG00000021451 |
|                  |                     | <i>Jaml</i>        | ENSMUSG00000048534 |
|                  |                     | <i>Klrk1</i>       | ENSMUSG00000030149 |
| Endothelial      |                     | <i>Cldn5</i>       | ENSMUSG00000041378 |
|                  |                     | <i>Cdh5</i>        | ENSMUSG00000031871 |
|                  |                     | <i>Egfl7</i>       | ENSMUSG00000026921 |
| Fibroblasts      |                     | <i>Dcn</i>         | ENSMUSG00000019929 |
|                  |                     | <i>Fgf2</i>        | ENSMUSG00000037225 |
|                  |                     | <i>Fgf7</i>        | ENSMUSG00000027208 |
| Hair follicle    | Upper hair follicle | <i>Krt79</i>       | ENSMUSG00000061397 |
|                  |                     | <i>Krt17</i>       | ENSMUSG00000035557 |
|                  | Sebaceous gland     | <i>Mgst1</i>       | ENSMUSG00000008540 |
|                  |                     | <i>Scd1</i>        | ENSMUSG00000037071 |
|                  | Outer bulge         | <i>Postn</i>       | ENSMUSG00000027750 |
|                  |                     | <i>Lgr5</i>        | ENSMUSG00000020140 |
|                  | Inner bulge         | <i>Krt6a</i>       | ENSMUSG00000058354 |
|                  |                     | <i>Krt75</i>       | ENSMUSG00000022986 |
| Base of follicle | <i>Shh</i>          | ENSMUSG00000002633 |                    |
| Hair germ        | <i>Gli1</i>         | ENSMUSG00000025407 |                    |
| Melanocytes      |                     | <i>Dct</i>         | ENSMUSG00000022129 |

|                     |  |               |                    |
|---------------------|--|---------------|--------------------|
|                     |  | <i>Mlana</i>  | ENSMUSG00000024806 |
|                     |  | <i>Tyr</i>    | ENSMUSG00000004651 |
| Red blood cells     |  | <i>Hbb-bs</i> | ENSMUSG00000052305 |
|                     |  | <i>Hbb-bt</i> | ENSMUSG00000073940 |
| Schwann cells       |  | <i>Mal</i>    | ENSMUSG00000027375 |
|                     |  | <i>Plp1</i>   | ENSMUSG00000031425 |
|                     |  | <i>Sox10</i>  | ENSMUSG00000033006 |
| Smooth muscle cells |  | <i>Acta2</i>  | ENSMUSG00000035783 |
|                     |  | <i>Myh11</i>  | ENSMUSG00000018830 |
|                     |  | <i>Myl9</i>   | ENSMUSG00000067818 |
|                     |  | <i>Myocd</i>  | ENSMUSG00000067818 |
|                     |  | <i>Rgs5</i>   | ENSMUSG00000026678 |

1073

**Supplementary Table 3:** Resources and reagents available

| Antibody                                                | Source                                                                   | Identifier | Dilution/<br>Concentration |
|---------------------------------------------------------|--------------------------------------------------------------------------|------------|----------------------------|
| 7-AAD Viability Staining Solution                       | Biolegend                                                                | 420404     | 1:500                      |
| Zombie Violet Fixable Live Dead stain                   | Biolegend                                                                | 423113     | 1:500                      |
| Zombie NIR Fixable Live Dead stain                      | Biolegend                                                                | 423105     | 1:500                      |
| Anti-mouse CD16/32 Antibody                             | Biolegend                                                                | 156603     | 1:500                      |
| APC anti-mouse CD45 Antibody clone: 30-F11              | Biolegend                                                                | 103111     | 1:100                      |
| FITC anti-mouse CD3 Antibody clone:17A2                 | Biolegend                                                                | 100203     | 1:100                      |
| BV650 anti-mouse Vy3 Antibody clone: 536                | BD                                                                       | 743241     | 1:50                       |
| PE Mouse Anti-Rat IgM clone:G53-238                     | BD                                                                       | 553888     | 1:100                      |
| Monoclonal antibody 17D1                                | Adrian Hayday, Kings College London and Robert Tigelaar, Yale University | N/A        | 1:50                       |
| PE/Cyanine7 anti-mouse CD45 Antibody clone: 30-F11      | Biolegend                                                                | 103114     | 1:100                      |
| APC anti-mouse Thy1.2 Antibody clone: 30-H12            | Biolegend                                                                | 105312     | 1:100                      |
| PE anti-mouse JAML Antibody clone: 4E10                 | Biolegend                                                                | 128503     | 1:100                      |
| BV711 anti-mouse CD100 Antibody clone: BMA-12           | BD                                                                       | 745492     | 1:100                      |
| PE/Cyanine5 anti-mouse CD44 Antibody clone: IM7         | Biolegend                                                                | 103010     | 1:100                      |
| APC/Cyanine7 anti-mouse CD25 Antibody clone: PC61       | Biolegend                                                                | 102026     | 1:100                      |
| PerCP/Cyanine5.5 anti-mouse CD69 Antibody clone: H1.2F3 | Biolegend                                                                | 104522     | 1:100                      |
| APC anti-mouse CD314 (NKG2D) Antibody clone: CX5        | Biolegend                                                                | 130212     | 1:100                      |
| Alexa Fluor 700 anti-mouse Ki-67 Antibody clone: 16A8   | Biolegend                                                                | 652420     | 1:50                       |
| BV711 anti-mouse CD326 (Ep-CAM) Antibody clone: G8.8    | Biolegend                                                                | 118233     | 1:100                      |
| PE anti-mouse CD200 Antibody clone: OX-90               | Biolegend                                                                | 123807     | 1:100                      |
| PE/Cyanine5 anti-mouse CD34 Antibody clone: MEC14.7     | Biolegend                                                                | 119312     | 1:100                      |
| BV605 anti-mouse Sca1 Antibody clone: D7                | Biolegend                                                                | 108133     | 1:100                      |

|                                                                                     |                         |           |       |
|-------------------------------------------------------------------------------------|-------------------------|-----------|-------|
| PE anti-mouse CD49f Antibody clone: GoH3                                            | Biolegend               | 313612    | 1:100 |
| FITC Phospho-PI3K p85/p55 (Tyr458, Tyr199) Monoclonal Antibody clone: PI3KY458-1A11 | ThermoFisher Scientific | MA5-36955 | 1:50  |
| PI3K p85 $\alpha$ Monoclonal Antibody clone: SU04-07                                | ThermoFisher Scientific | MA5-41128 | 1:50  |
| Alexa Fluor 405 Goat anti-Rabbit IgG (H+L) Secondary Antibody                       | ThermoFisher Scientific | A-31556   | 1:100 |
| Anti-MADH7/SMAD7 polyclonal antibody                                                | Abcam                   | ab216428  | 1:100 |

| <b>Cell media</b>                                      |                 |             |            |
|--------------------------------------------------------|-----------------|-------------|------------|
| Leibovitz's L-15 Medium, powder                        | Gibco           | 41300039    | N/A        |
| L-aspartic acid                                        | Millipore-Sigma | 11189       | 0.449 g/L  |
| L-glutamine                                            | Millipore-Sigma | G8540       | 0.500 g/L  |
| L-proline                                              | Millipore-Sigma | 81709       | 0.450 g/L  |
| L-glutamic acid                                        | Millipore-Sigma | 49449       | 0.250 g/L  |
| $\alpha$ -ketoglutaric acid                            | Millipore-Sigma | K1128       | 0.449 g/L  |
| Sodium hydroxide                                       | Millipore-Sigma | S8045       | 10 N       |
| D-glucose                                              | Millipore-Sigma | G7021       | 18.018 g/L |
| FBS (USDA approved; for tick media)                    | Millipore-Sigma | F0926-500ML | 0.1        |
| Bacto™ Tryptose Phosphate Broth                        | BD              | 260300      | 5%         |
| Lipoprotein Concentrate                                | MP Biomedicals  | 191476      | 0.1%       |
| Corning® 100 mL Penicillin-Streptomycin Solution, 100x | Corning         | 30-002-CI   | 1:100      |
| Amphotericin B                                         | Gibco           | 15290-026   | 1:100      |
| Distilled water                                        | Gibco           | 15-230-147  | N/A        |
|                                                        |                 |             |            |
| <b>Materials</b>                                       |                 |             |            |
| Cell culture plate with lid (6 well, flat bottom)      | Sigma           | SIAL0516    | N/A        |

|                                                                             |                     |                |       |
|-----------------------------------------------------------------------------|---------------------|----------------|-------|
| Cellstart®, 96 well cell culture plate, F-bottom                            | Greiner bio-one     | 655 160        | N/A   |
| Costar® cell culture plate with lid (24 well, flat bottom)                  | Corning             | CLS3526-1EA    | N/A   |
| Nunc™ 96-Well Polystyrene Round Bottom Microwell Plates                     | Thermo Scientific   | 262162         | N/A   |
| Vannas spring scissors, 4 mm cutting edge straight                          | Fine Science        | 15018-10       | N/A   |
| Integra Miltex 2 mm biopsy punches                                          | Integra             | 95039-098      | N/A   |
| Integra Miltex 5 mm biopsy punches                                          | Integra             | 33-35          | N/A   |
| AcuPunch biopsy punches 10 mm                                               | Acuderm             | P1050          | N/A   |
| FALCON® 14 ml Polypropylene round-bottom tube                               | Corning             | 352059         | N/A   |
| Corning® cell strainer size 40 µm, blue, sterile                            | Corning             | 431750         | N/A   |
| Falcon 5 mL Round Bottom Polystyrene Test Tube, with Cell Strainer Snap Cap | Corning             | 352235         | N/A   |
| 12x75mm Plastic Tubes                                                       | Globe Scientific    | 110441         | N/A   |
| 1.5 mL Eppendorf Safe-Lock Tubes                                            | USA Scientific      | 1615-5500      | N/A   |
| 1.5ml Microcentrifuge Tubes with Socket Screw Caps                          | VWR                 | 525-1238       | N/A   |
| Lo-bind tubes                                                               | Eppendorf           | 22431048       | N/A   |
| Vannas Spring Scissors - 4mm                                                | Fine Science Tools  | 15018-10       | N/A   |
|                                                                             |                     |                |       |
| <b>Reagents</b>                                                             |                     |                |       |
| Trypsin/Lys-C Mix, Mass Spec Grade                                          | Promega             | V5071          | N/A   |
| Bovine Serum Albumin                                                        | Millipore-Sigma     | A2058-5G       | N/A   |
| BenchMark™ FBS                                                              | Gemini Bio-products | 100-106        | 1:10  |
| Methanol anhydrous, 99.8%                                                   | Millipore-Sigma     | 322415-1L      | 0-20% |
| Ethyl alcohol, Pure; 200 proof for molecular biology                        | Millipore-Sigma     | E7023-1L       | 1:1   |
| TRIzol reagent                                                              | Ambion              | 15596018       | N/A   |
| Liberase™ TL Research Grade                                                 | Roche               | 540102000<br>1 | 10%   |
| RPMI-1640 with L-Glutamine                                                  | Quality Biological  | 722461         | N/A   |

|                                                     |                          |                 |                    |
|-----------------------------------------------------|--------------------------|-----------------|--------------------|
| DNase I                                             | Roche                    | 112849320<br>01 | N/A                |
| 10X Phosphate-buffered saline (PBS)                 | Quality Biological       | 119-069-<br>131 | 1X                 |
| Phosphate-buffered saline (PBS)                     | Gibco                    | 10010-023       | N/A                |
| 0.5M Ethylenediaminetetraacetic acid (EDTA), pH 8.0 | Boston BioProducts       | BM-150          | N/A                |
| Sodium azide (NaN <sub>3</sub> )                    | Sigma-Aldrich            | S2002-25G       | N/A                |
| Paraformaldehyde                                    | Thermo Fisher Scientific | J61899-AP       | N/A                |
| RIPA lysis buffer                                   | Millipore                | 20-188          | 1X                 |
| Halt Protease Inhibitor Cocktail                    | Thermo Fisher Scientific | 87786           | 1X                 |
| Halt™ Phosphatase Inhibitor Cocktail                | Thermo Fisher Scientific | 78420           | 1X                 |
| Dispase II                                          | Sigma-Aldrich            | D4693-1G        | NA                 |
| Dispase                                             | Gibco                    | 17105-041       | 4 U/mL             |
| Magnesium chloride (MgCl <sub>2</sub> )             | Sigma-Aldrich            | M2393-<br>100G  | 5mM                |
| Calcium chloride (CaCl <sub>2</sub> )               | Sigma-Aldrich            | C1016-<br>100G  | 0.4mM              |
| Collagenase D                                       | Sigma-Aldrich            | 110888660<br>01 | 2.5mg/mL           |
| Gum rosin                                           | Millipore-Sigma          | 60895           | 75% (3/4<br>parts) |
| Beeswax                                             | Thermo Fisher Scientific | S25192A         | 25% (1/4<br>parts) |
| Cytochalasin D                                      | Sigma-Aldrich            | C8273           | 1:100              |
|                                                     |                          |                 |                    |
| <b>Commercial Assays</b>                            |                          |                 |                    |
| Pure Link RNA mini kit                              | Ambion                   | 12183025        | N/A                |
| Silencer™ siRNA Construction Kit                    | Thermo Scientific        | AM1620          | N/A                |
| Verso cDNA Synthesis Kit                            | Thermo Scientific        | AB-1453B        | N/A                |
| Pierce BCA Protein Assay Kit                        | Thermo Scientific        | 23227           | N/A                |
| DNeasy® Blood and Tissue kit                        | Qiagen                   | 69506           | N/A                |

|                                                                      |                                                                                                                 |           |     |
|----------------------------------------------------------------------|-----------------------------------------------------------------------------------------------------------------|-----------|-----|
| FOXP3 Fix/Perm Buffer Set                                            | BioLegend                                                                                                       | 421403    | N/A |
| Human KGF/FGF-7 Quantikine ELISA Kit                                 | R&D Systems                                                                                                     | DKG00     | NA  |
| Human/Mouse/Rat/Porcine/Canine TGF- $\beta$ 1 ELISA – Quantikine kit | R&D Systems                                                                                                     | DB100C    | NA  |
|                                                                      |                                                                                                                 |           |     |
| <b>Organisms</b>                                                     |                                                                                                                 |           |     |
| <i>Ixodes scapularis</i> adult partially fed female ticks            | Albert Mulenga, Texas A&M University                                                                            | N/A       | N/A |
| <i>Ixodes scapularis</i> adult partially fed female ticks            | Adela Oliva Chavez, Texas A&M University                                                                        | N/A       | N/A |
| <i>Ixodes scapularis</i> nymph ticks                                 | Jon Oliver and Ulrike Munderloh, University of Minnesota                                                        | N/A       | N/A |
| <i>Ixodes scapularis</i> nymph ticks                                 | Tick Lab, Oklahoma State University                                                                             | N/A       | N/A |
| <i>Amblyomma americanum</i> nymph ticks                              | Tick Lab, Oklahoma State University                                                                             | N/A       | N/A |
| <i>Dermacentor variabilis</i> nymph ticks                            | Tick Lab, Oklahoma State University                                                                             | N/A       | N/A |
| C57BL6J (WT) mice                                                    | University of Maryland                                                                                          | N/A       | N/A |
| C57BL6J (WT) mice                                                    | Jackson Laboratories                                                                                            | #000664   | N/A |
| FVB/NJ mice                                                          | The Jackson Laboratory                                                                                          | 001800    | N/A |
| FVB/NTac mice                                                        | Taconic Biosciences                                                                                             | N/A       | N/A |
|                                                                      |                                                                                                                 |           |     |
| <b>Equipment</b>                                                     |                                                                                                                 |           |     |
| CFX96 Touch Real-Time PCR Detection System                           | Biorad                                                                                                          | N/A       | N/A |
| Nanoject III                                                         | Drummond Scientific Company                                                                                     | 3-000-207 | N/A |
| NanoSight NS300                                                      | Malvern Panalytical                                                                                             | N/A       | N/A |
| Percival I30BLL incubator                                            | Percival                                                                                                        | I30BLL    | N/A |
|                                                                      |                                                                                                                 |           |     |
| <b>Software</b>                                                      |                                                                                                                 |           |     |
| GraphPad Prism v9.1.2                                                | <a href="https://www.graphpad.com/">https://www.graphpad.com/</a>                                               | N/A       | N/A |
| GraphPad Quick Cals Outlier Calculator                               | <a href="https://www.graphpad.com/quickcalcs/Gru/bbs1.cfm">https://www.graphpad.com/quickcalcs/Gru/bbs1.cfm</a> | N/A       | N/A |

|                                                                                        |                                                                                                                                                                                                                                                                 |     |     |
|----------------------------------------------------------------------------------------|-----------------------------------------------------------------------------------------------------------------------------------------------------------------------------------------------------------------------------------------------------------------|-----|-----|
| FlowJo (v10.6.1 – 10.8.1)                                                              | <a href="https://www.flowjo.com/">https://www.flowjo.com/</a>                                                                                                                                                                                                   | N/A | N/A |
| QIAGEN Ingenuity Pathway Analysis                                                      | <a href="https://digitalinsights.qiagen.com/products-overview/discovery-insights-portfolio/analysis-and-visualization/qiagen-ipa/">https://digitalinsights.qiagen.com/products-overview/discovery-insights-portfolio/analysis-and-visualization/qiagen-ipa/</a> | N/A | N/A |
| Database for Annotation, Visualization and Integrated Discovery (DAVID) (version 2021) | <a href="https://david.ncifcrf.gov/">https://david.ncifcrf.gov/</a>                                                                                                                                                                                             | N/A | N/A |

1075

1076
